# Supplementary material for: Synthesis, structure and hydrosilylation activity of neutral and cationic rare-earth metal silanolate complexes
Source: Royal Society of Chemistry journal article supplement (doi:10.1039/b512285f), 2005-12-06

Manuscript for Dalton Transactions: ESI (30/08/2005)

## Synthesis, Structure and Hydrosilylation Activity of Neutral and Cationic Rare-Earth Metal Silanolate Complexes

Benjamin R. Elvidge, Stefan Arndt, Thomas P. Spaniol and Jun Okuda\*

### Electronic Supplementary Information

#### Contents

- ii Molecular Structure of  $[\text{Sc}\{\text{OSi}(\text{O}^t\text{Bu})_3\}(\text{CH}_2\text{SiMe}_3)_2]$
- iii Selected VT  $^1\text{H}$  NMR Spectra of **1** ( $\text{C}_7\text{D}_8$ )
- iv  $^1\text{H}$  NMR Spectrum of **1** ( $\text{thf-}d_8$ )
- v Selected VT  $^1\text{H}$  NMR Spectra of **1** ( $\text{thf-}d_8$ )
- vi Sequential addition of thf to **1** ( $\text{C}_6\text{D}_6$ )
- viii  $^1\text{H}$  NMR Spectrum of **4** ( $\text{C}_7\text{D}_8$ )
- ix  $^1\text{H}$  NMR Spectrum of **9** ( $\text{CD}_2\text{Cl}_2$ )
- x  $^1\text{H}$  NMR Spectra of **16** ( $\text{thf-}d_8$  and  $\text{C}_5\text{D}_5\text{N}$ )
- xi Time-conversion plot for Hydrosilylation of 1-decene using **1** as catalyst

Molecular structure of  $[\text{Sc}\{\text{OSi}(\text{O}^t\text{Bu})_3\}(\text{CH}_2\text{SiMe}_3)_2]$  (ellipsoids drawn at the 50% probability level, hydrogen atoms and methyl groups omitted for clarity)

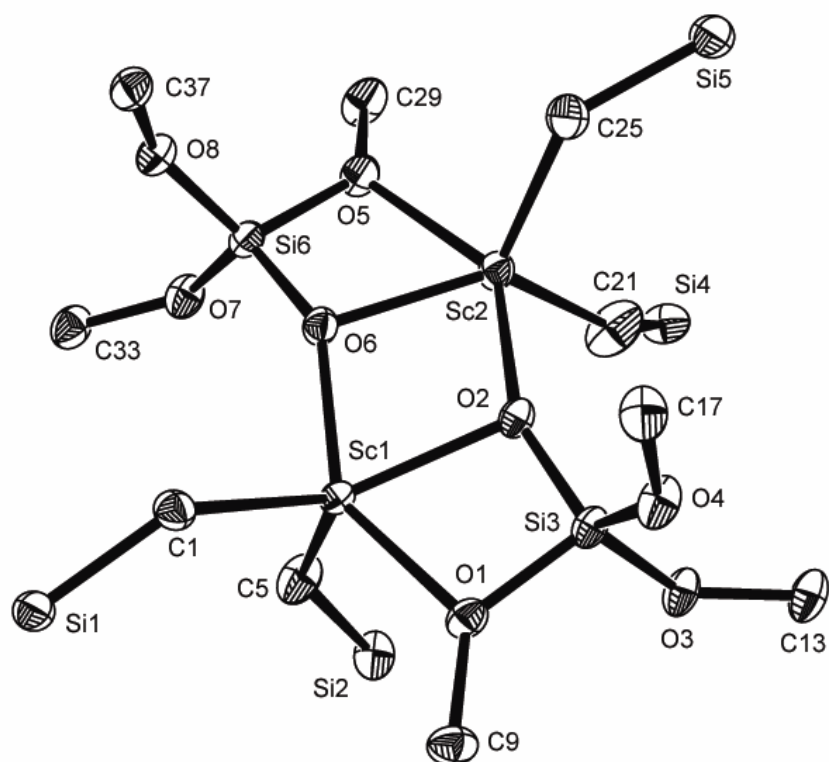

Selected VT  $^1\text{H}$  NMR Spectra of **1** ( $\text{C}_7\text{D}_8$ )

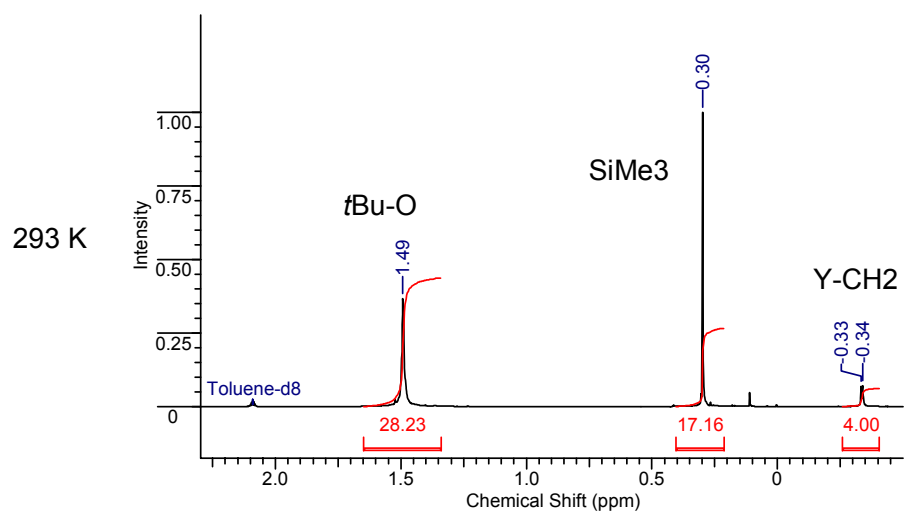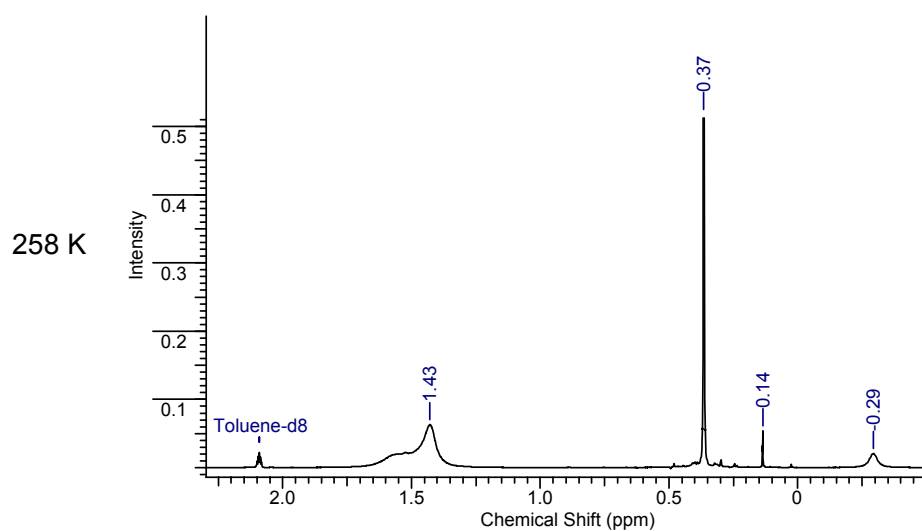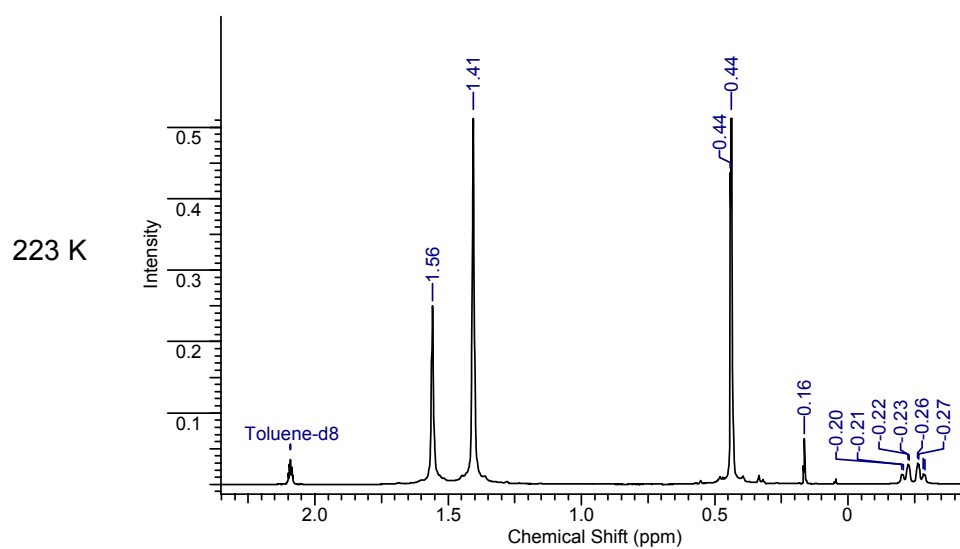

$^1\text{H}$  NMR Spectrum of **1** (thf- $d_8$ )

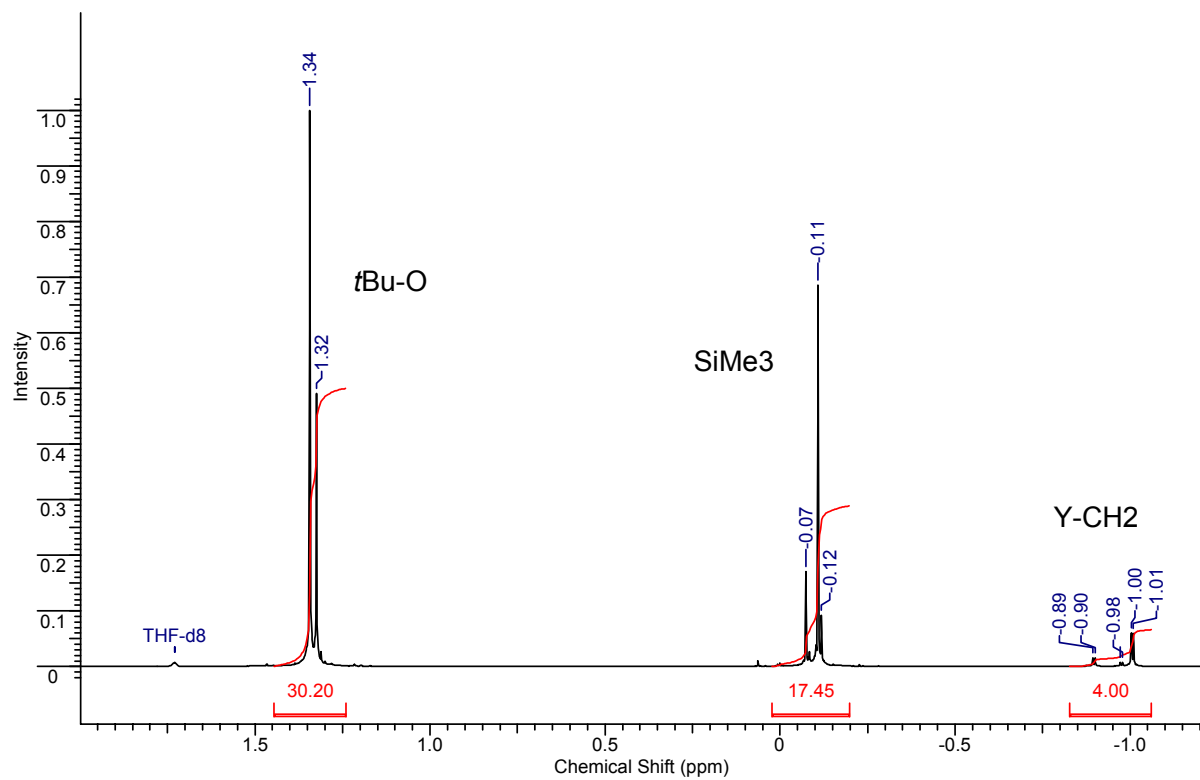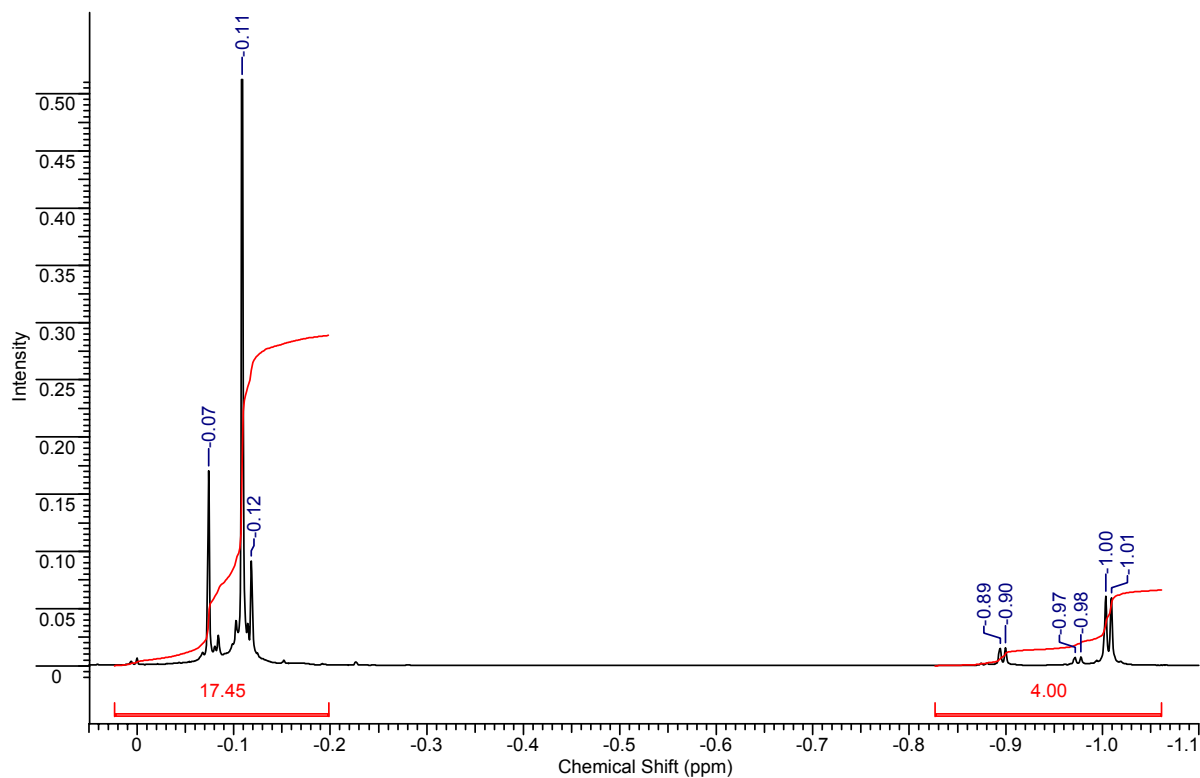

Supplementary Material (ESI) for Dalton Transactions

This journal is © The Royal Society of Chemistry 2005

Selected VT  $^1\text{H}$  NMR Spectra of **1** (thf- $d_8$ )

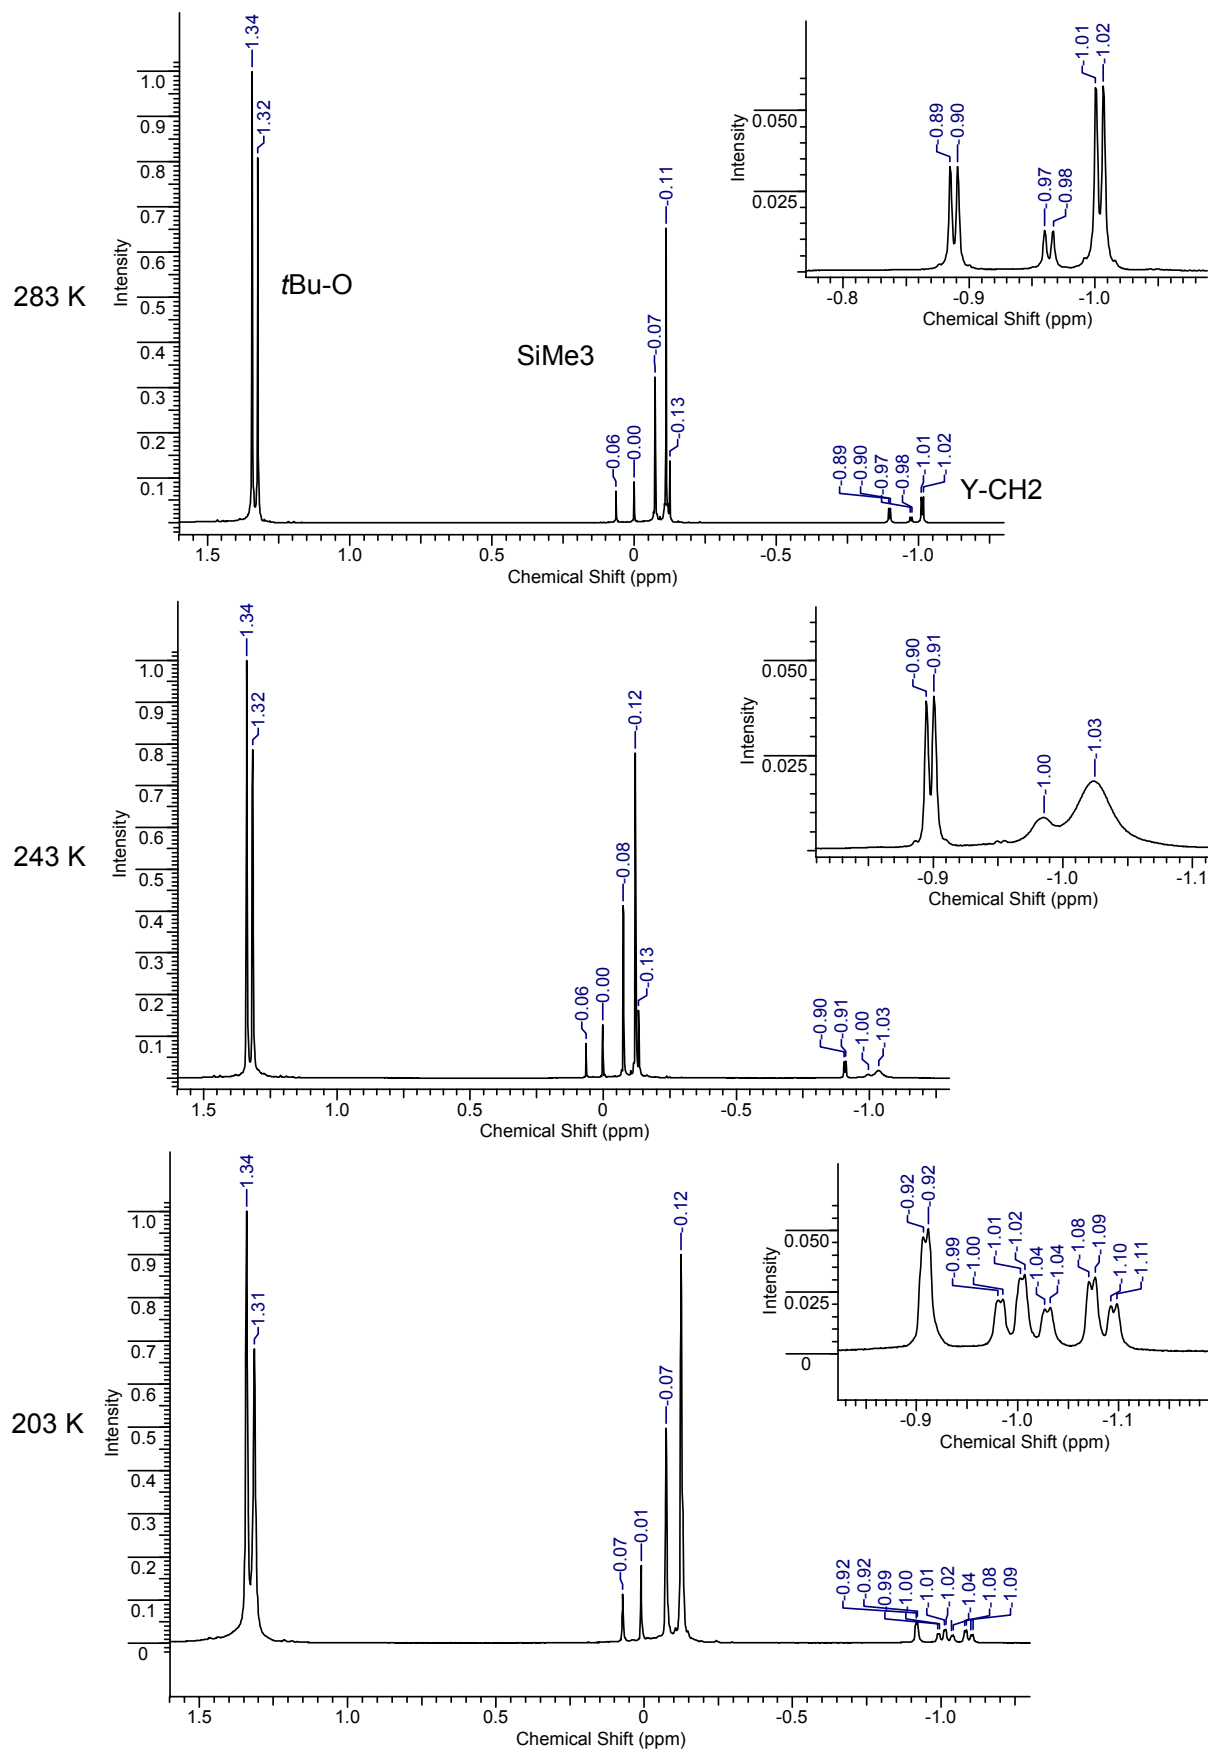

Sequential addition of thf to **1** (C<sub>6</sub>D<sub>6</sub>)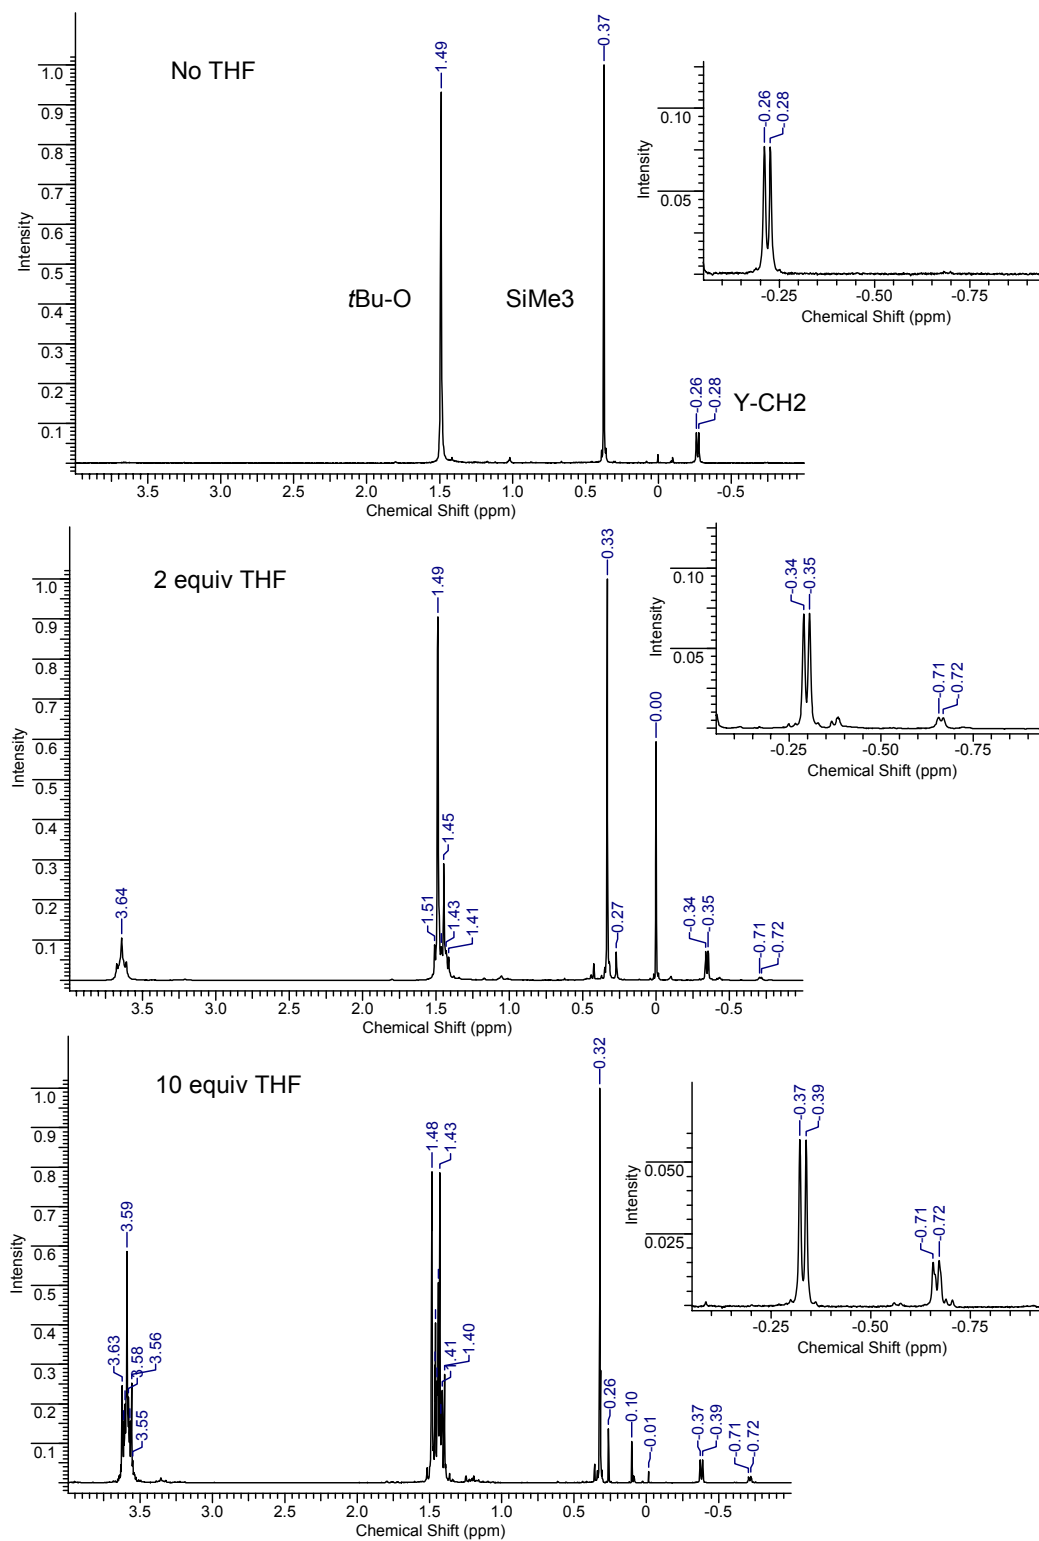

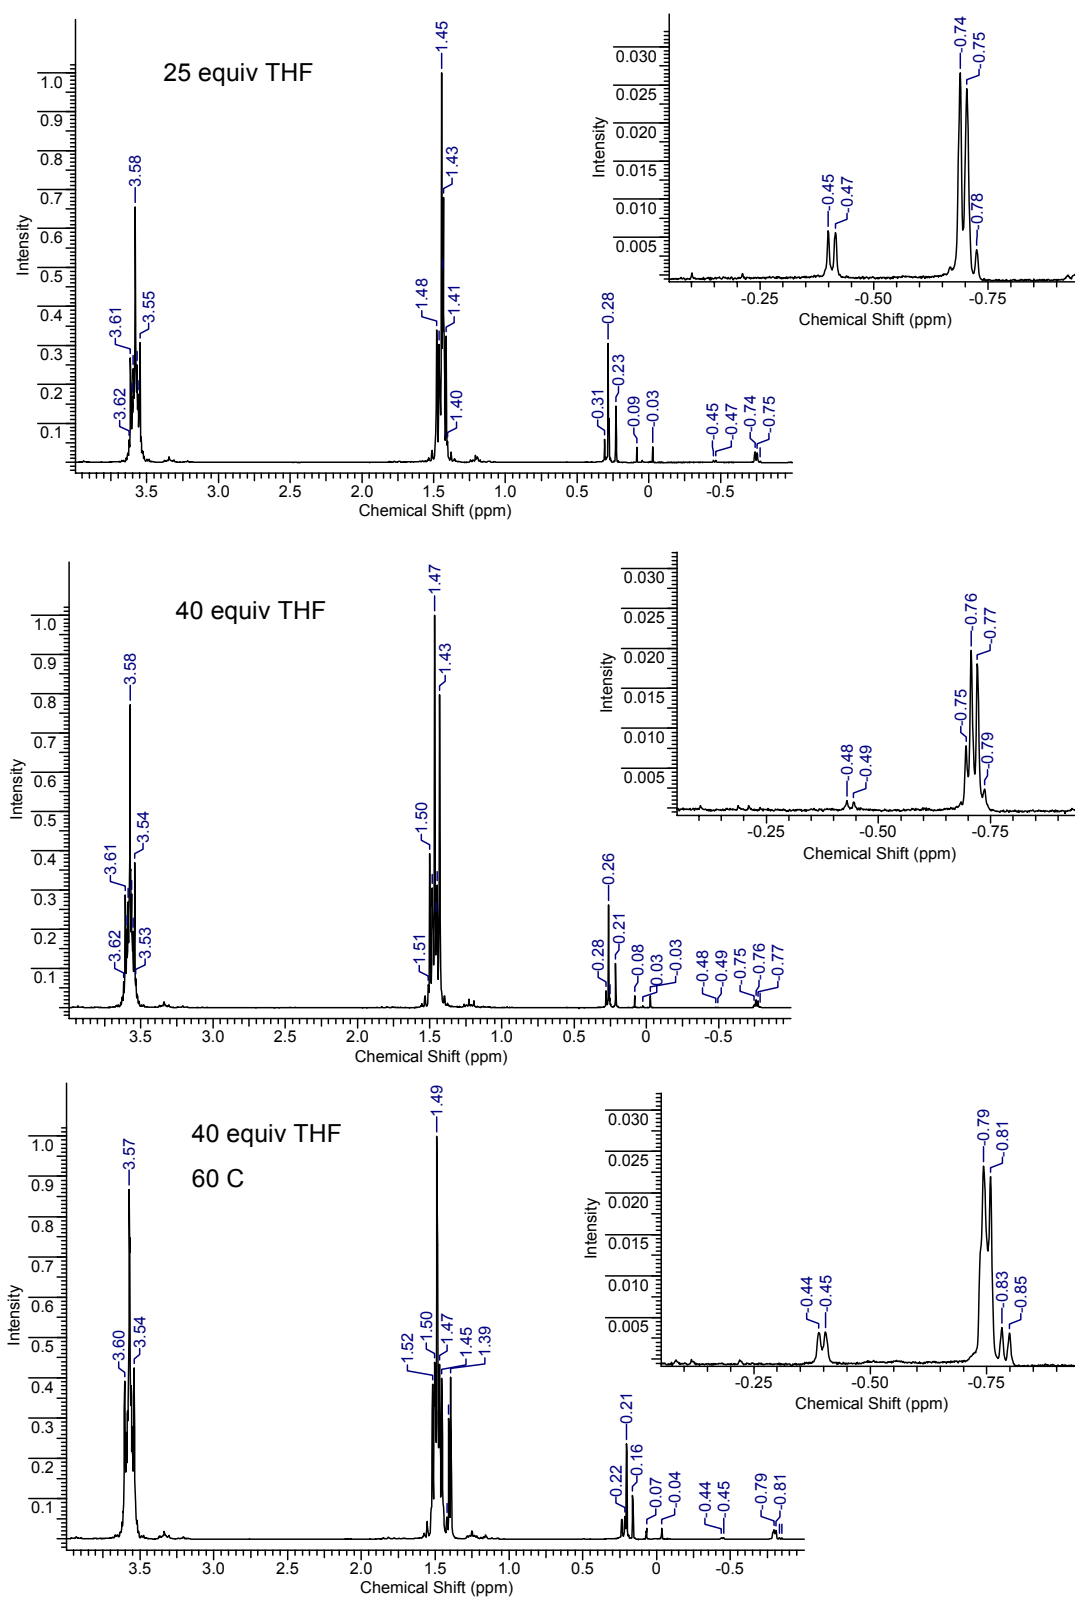



$^1\text{H}$  NMR Spectrum of **4** ( $\text{C}_7\text{D}_8$ )

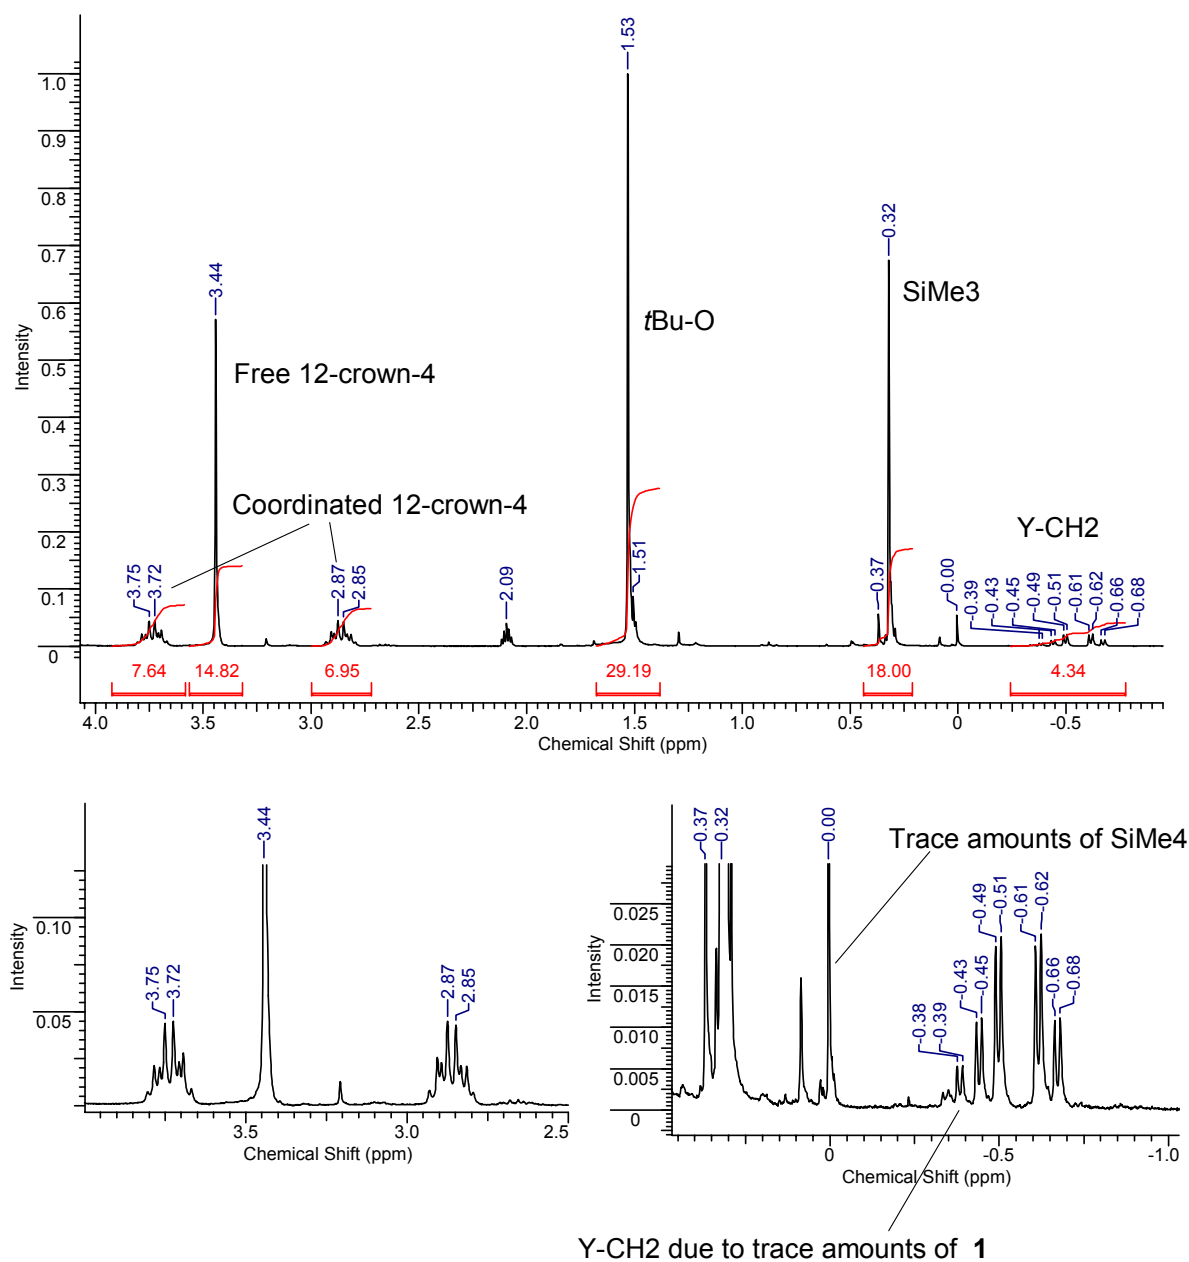

Supplementary Material (ESI) for Dalton Transactions

This journal is © The Royal Society of Chemistry 2005

$^1\text{H}$  NMR Spectra of **9** ( $\text{CD}_2\text{Cl}_2$ )

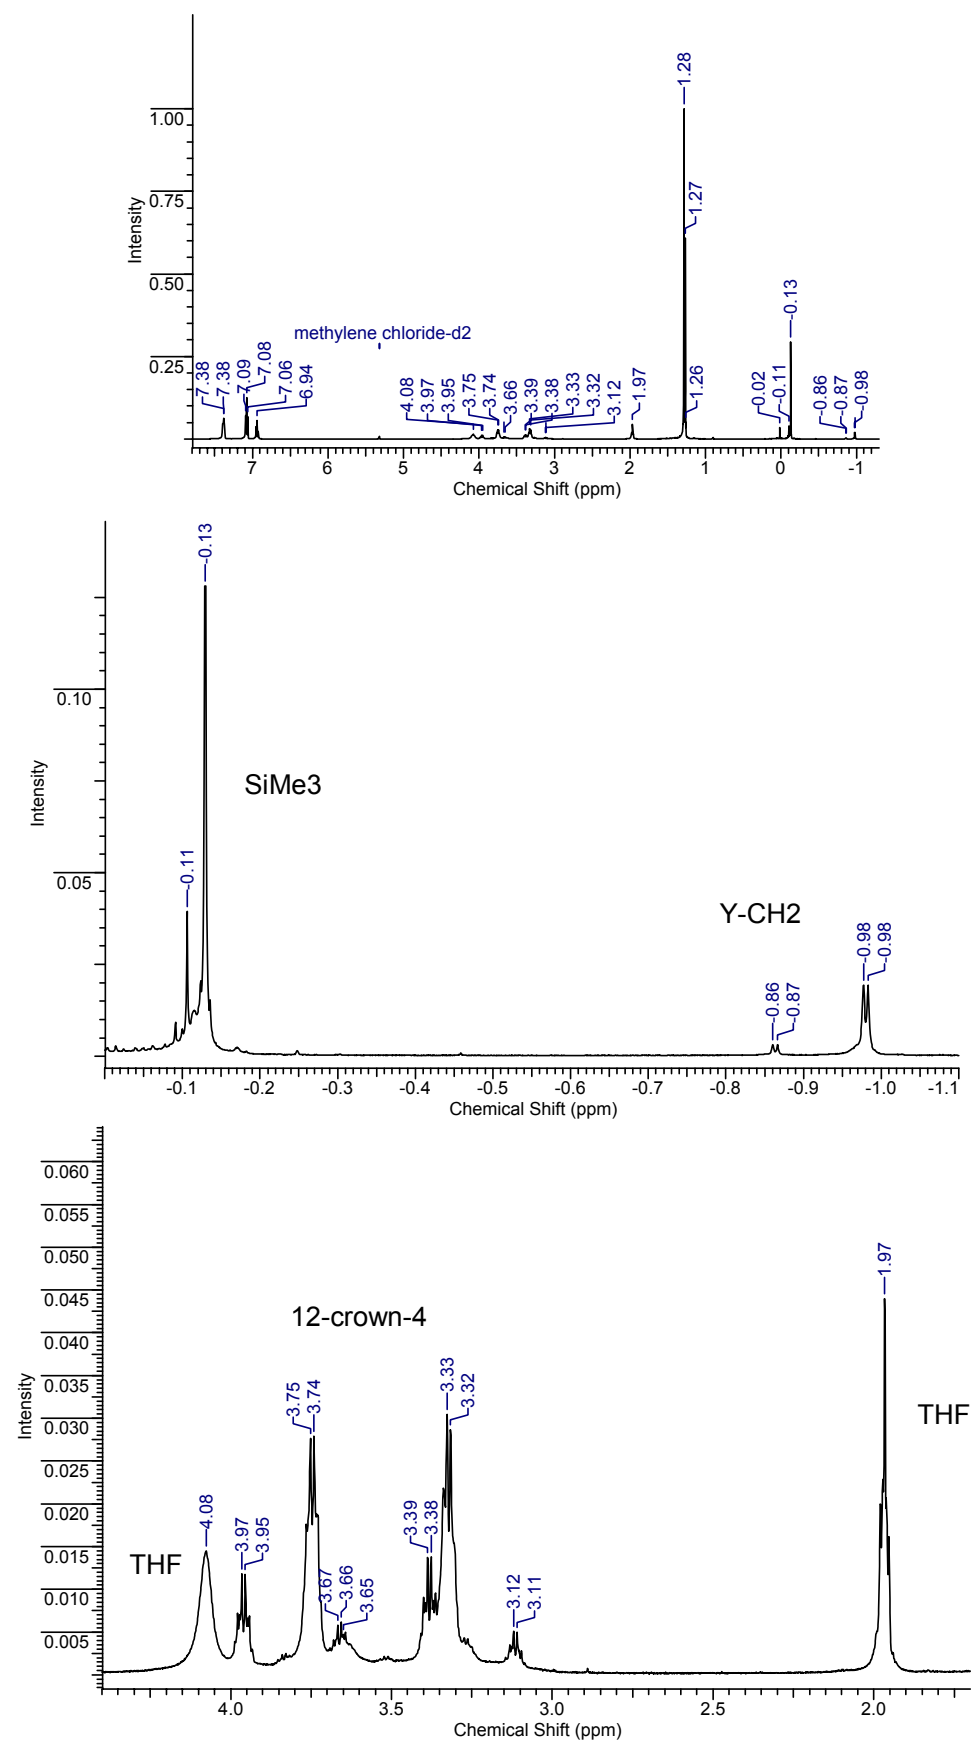

$^1\text{H}$  NMR Spectrum of **16** (thf- $d_8$  and  $\text{C}_5\text{D}_5\text{N}$ )

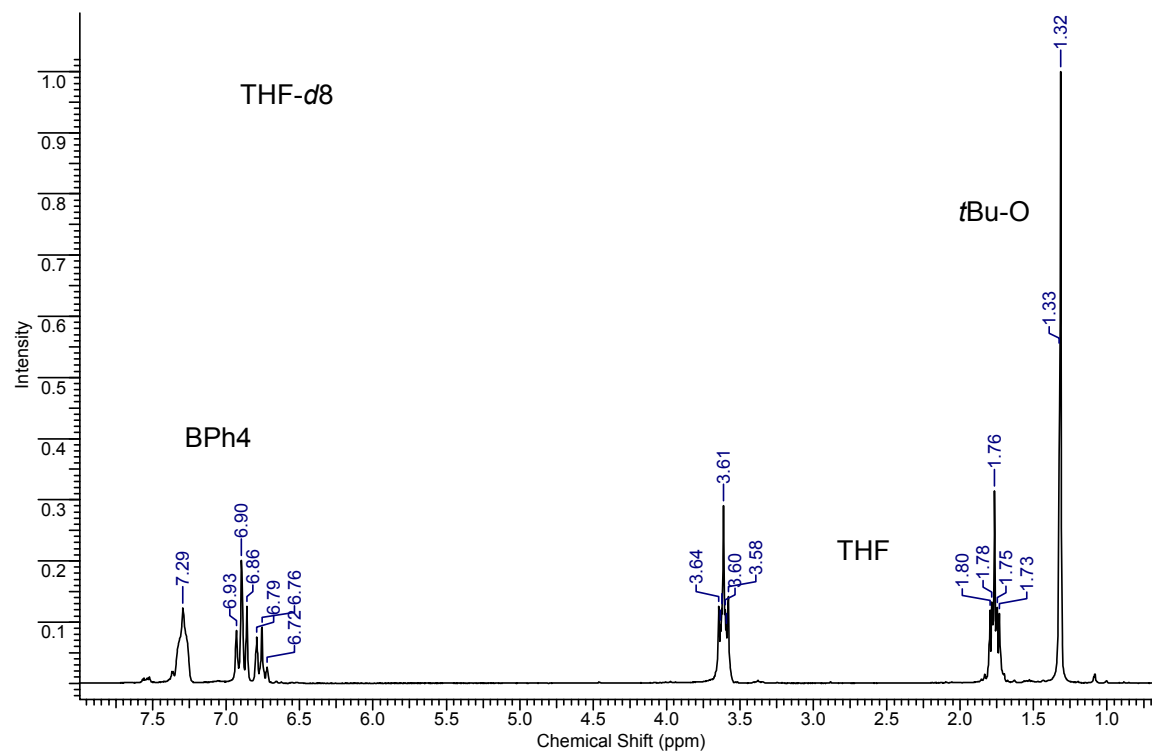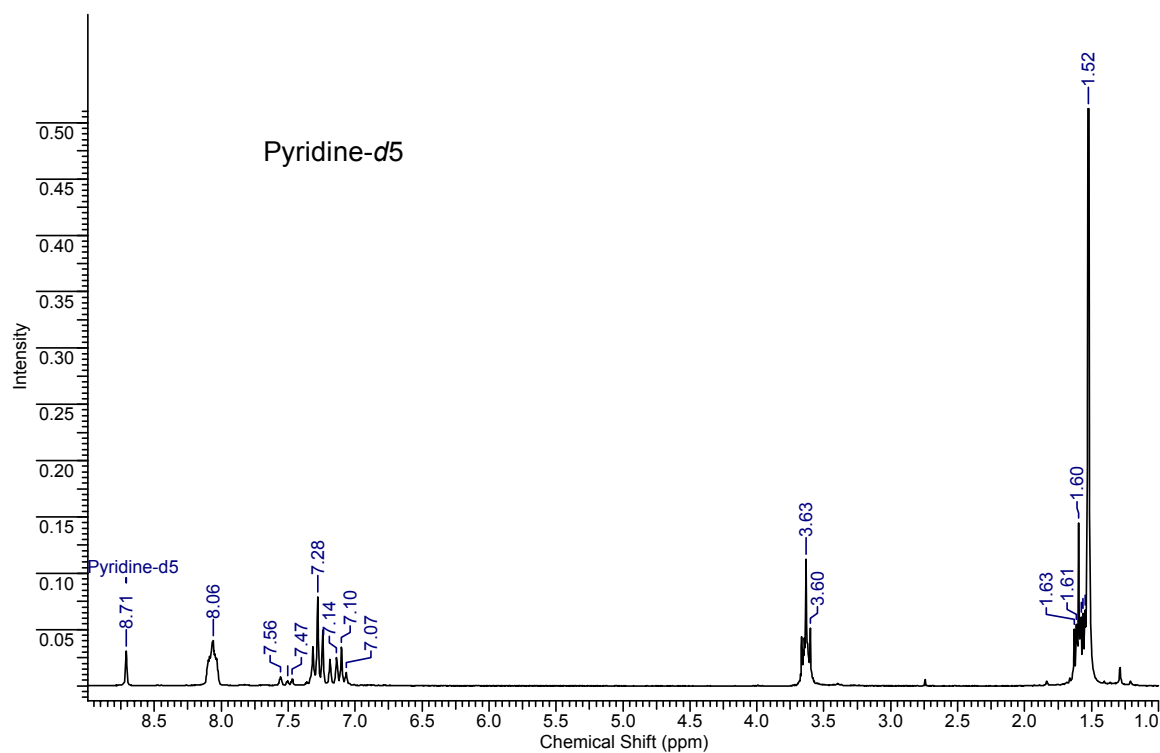

Time-conversion plot for Hydrosilylation of 1-decene using **1** as catalyst

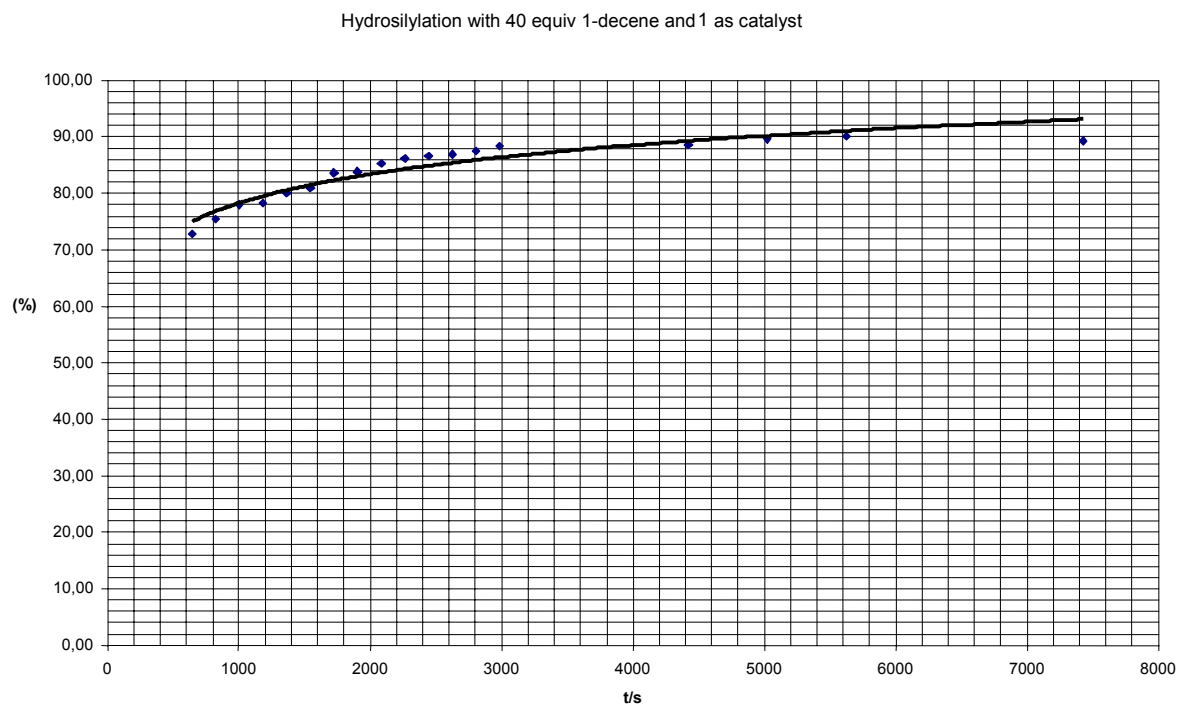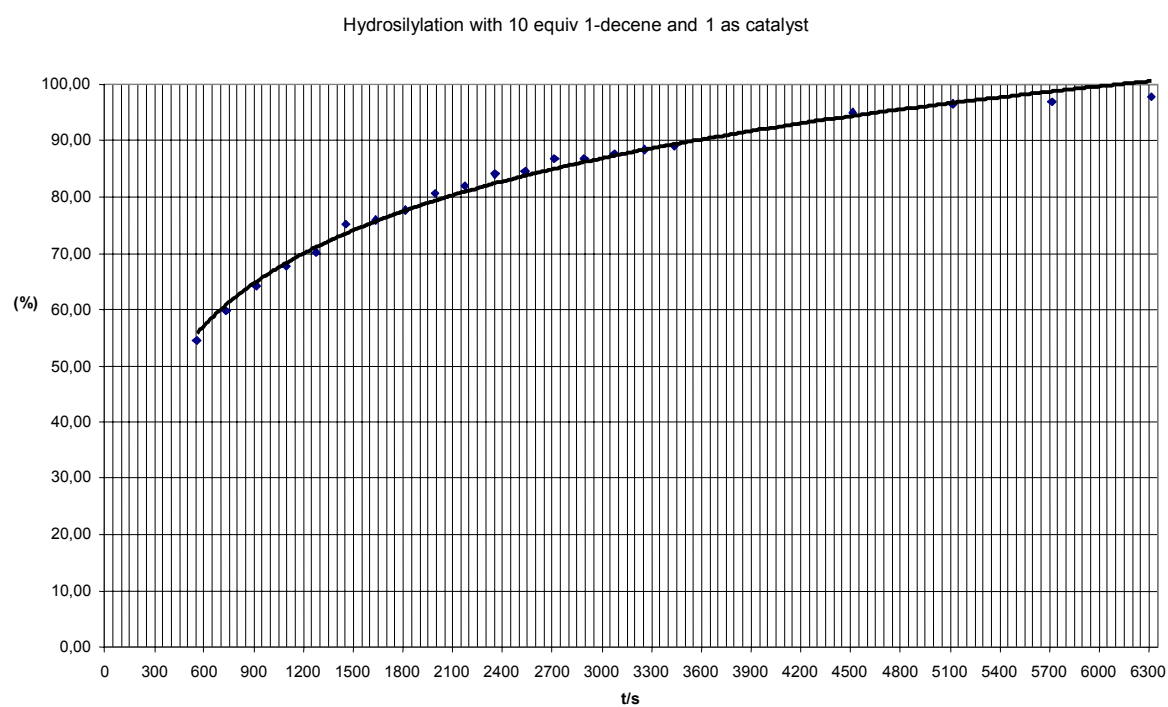

Supplement: b512285f.pdf [file b512285f.pdf]
